# Supplementary material
Source: HighWire-hosted journal article supplement (http://www.cmaj.ca/highwire/filestream/59202/field_highwire_adjunct_files/3/strep-cohen-12-at.pdf)
Supplement: strep-cohen-12-at.pdf [file strep-cohen-12-at.pdf]

**Appendix 12 (as supplied by the authors): Frequency of group A streptococcus (GAS) by risk level defined by prediction rules: comparison between previous pediatric studies and the present study**

A. Breese score

|               | Breese [1] | Fischer-Walker [2] | Ulukol* [3] | Present study |
|---------------|------------|--------------------|-------------|---------------|
| Country       | USA        | Egypt              | Turkey      | France        |
| Year          | 1973–1975  | 1992–1993          | 2000**      | 2010–2011     |
| Age           | Unclear    | 2–13 yr            | 4–17 yr     | 3–15 yr       |
| N             | 670        | 410                | 514         | 676           |
| GAS+ cultures |            |                    |             |               |
| Overall       | 54.2       | 24.6               | 31.3        | 41            |
| Breese < 30   | 22.0       | 20                 | 13.9        | 35            |
| Breese ≥ 30   | 77.6       | 44                 | 51.3        | 50            |

\*Group 2 (age > 3yrs); \*\*Publication date.

B. McIsaac score

|               | Cohen [4] | McIsaac [5] | Cohen [6] | Tanz [7]  | Fine [8]  | Present study |
|---------------|-----------|-------------|-----------|-----------|-----------|---------------|
| Country       | France    | Canada      | France    | USA       | USA       | France        |
| Year          | 1998–1999 | 1999–2002   | 2009–2010 | 2004–2005 | 2006–2008 | 2010–2011     |
| Age           | Unclear   | 3–17 yr     | 3–15 yr   | 3–18 yr   | 3–14 yr   | 3–15 yr       |
| N             | 604       | 454         | 785       | 1848      | 64789     | 676           |
| GAS+ cultures |           |             |           |           |           |               |
| Overall       | 45.5      | 34.1        | 36.3      | 30        | 37        | 41            |
| 1             | 1.0       | -           | 25        | 19        | 17        | 38            |
| 2             | 27.5      | 20.5        | 24        | 20        | 23        | 37            |
| 3             | 43.7      | 27.5        | 34        | 29        | 34        | 38            |
| 4-5           | 47.8      | 67.8        | 41        | 49        | 55        | 46            |

C. Wald score

|               | Cohen [4] | Present study |
|---------------|-----------|---------------|
| Country       | France    | France        |
| Year          | 1998–1999 | 2010–2011     |
| Age           | Unclear   | 3–15 yr       |
| N             | 604       | 676           |
| GAS+ cultures |           |               |
| Overall       | 45.5      | 41            |
| 1             | 16.7      | 22            |
| 2             | 39.3      | 32            |
| 3             | 38        | 36            |
| 4             | 49.5      | 39            |
| 5             | 51.9      | 47            |
| 6             | 60.0      | 57            |

D. Attia score

|               | Attia [9] | Present study |
|---------------|-----------|---------------|
| Country       | USA       | France        |
| Year          | 1999–2000 | 2010–2011     |
| Age           | 1–18 yr   | 3–15 yr       |
| N             | 545       | 676           |
| GAS+ cultures |           |               |

Appendix to: Cohen JF, Cohen R, Levy C, et al. Selective testing strategies for diagnosing group A streptococcal infection in children with pharyngitis: a systematic review and prospective multicentre external validation study. *CMAJ* 2014.

DOI:10.1503/cmaj.140772.

Copyright © 2015 The Author(s) or their employer(s).

To receive this resource in an accessible format, please contact us at [cmajgroup@cmaj.ca](mailto:cmajgroup@cmaj.ca)

|         |    |    |
|---------|----|----|
| Overall | 37 | 41 |
| 0       | 12 | 39 |
| 1-3     | 36 | 39 |
| ≥4      | 79 | 81 |

## References

1. Breese BB. A simple scorecard for the tentative diagnosis of streptococcal pharyngitis. *Am J Dis Child* 1977;131:514-517.
2. Fischer Walker CL, Rimoin AW, Hamza HS, et al. Comparison of clinical prediction rules for management of pharyngitis in settings with limited resources. *J Pediatr* 2006;149:64-71.
3. Ulukol B, Gunlemez A, Aysev D, et al. Alternative diagnostic method for streptococcal pharyngitis: Breese scoring system. *Turk J Pediatr* 2000;42:96-100.
4. Cohen R, Levy C, Ovetchkine P, et al. Evaluation of streptococcal clinical scores, rapid antigen detection tests and cultures for childhood pharyngitis. *Eur J Pediatr* 2004;163:281-282.
5. McIsaac WJ, Kellner JD, Aufricht P, et al. Empirical validation of guidelines for the management of pharyngitis in children and adults. *JAMA* 2004;291:1587-1595.
6. Cohen JF, Leis A, Lecarpentier T, et al. Procalcitonin predicts response to Beta-lactam treatment in hospitalized children with community-acquired pneumonia. *PLoS One* 2012;7:e36927.
7. Tanz RR, Gerber MA, Kabat W, et al. Performance of a rapid antigen-detection test and throat culture in community pediatric offices: implications for management of pharyngitis. *Pediatrics* 2009;123:437-444.
8. Fine AM, Nizet V, Mandl KD. Large-scale validation of the Centor and McIsaac scores to predict group A streptococcal pharyngitis. *Arch Intern Med* 2012;172:847-852.
9. Attia MW, Zaoutis T, Klein JD, et al. Performance of a predictive model for streptococcal pharyngitis in children. *Arch Pediatr Adolesc Med* 2001;155:687-691.
